# Supplementary material for: Introduction of Mismatches in a Random shRNA-Encoding Library Improves Potency for Phenotypic Selection
Source: PLOS journal article supplement (doi:10.1371/journal.pone.0087390), 2014-02-03
Supplement: S2 (10.1371/journal.pone.0087390.s002) [file journal.pone.0087390.s002]

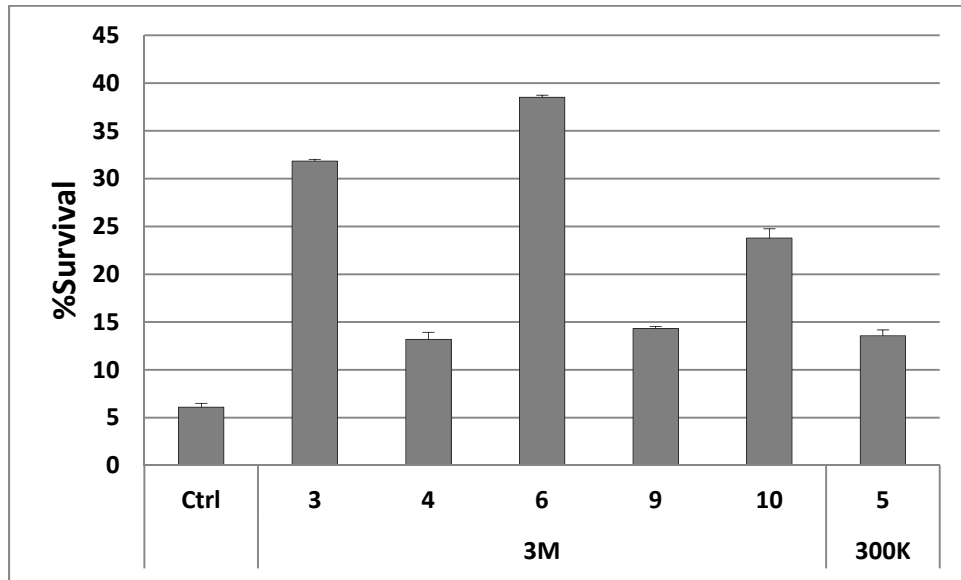

**Figure S2. shRNAs selected from the second-generation library better protect FL5.12 cells from IL3 withdrawal.** FL5.12 cells were transduced with different shRNA clones obtained from the side-by-side screen. The cells were subject to an overnight IL3 withdrawal. Survival percentages (percentages of GFP+/To-Pro-3- cells) are shown, relative to the beginning of IL3 starvation. All six clones, five from the second-generation (3M) library and one from the first-generation (300K) library were significantly more protective than control ( $p < 0.0001$  for all). Clones 3M-3, -6, and -10 were also significantly more protective than clone 300K-5 ( $p < 0.001$  for all).
